# Supplementary material for: Snapshot Surveys for Lake Monitoring, More Than a Shot in the Dark
Source: Front Ecol Evol. Author manuscript; Available in PMC 2020 Mar 17. (PMC7077876; doi:10.3389/fevo.2018.00201)
Supplement: Sup 1 [file NIHMS1052921-supplement-Sup_1.pdf]

**Table 1.** Characteristics of the five main lake monitoring strategies (Routine sampling, automated high-frequency sampling, remote sensing, disparate data and snapshot sampling) addressing the scale that they can cover (temporal vs. spatial); the investment in time, money, personnel and equipment; the potential outcome with regards data integration, accuracy, efficiency collaboration and data sharing; and potential caveats.

|            | Rank                                                                                                            | Routine Sampling                   | Automated High Frequency            | Remote Sensing               | Disparate Data               | Snapshot Sampling               |
|------------|-----------------------------------------------------------------------------------------------------------------|------------------------------------|-------------------------------------|------------------------------|------------------------------|---------------------------------|
| Scale      | 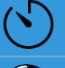 Temporal scale                | ✓                                  | ✓                                   | ✓                            | ✓                            | ✓                               |
|            | 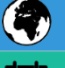 Spatial scale                 | ✓                                  | ✓                                   | ✓                            | ✓                            | ✓                               |
| Investment | 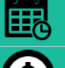 Time                          | Long-term effort                   | Long-term effort                    | Long-term effort             | Long-term effort             | Short-term effort               |
|            | 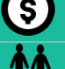 Money                         | Relatively expensive               | Cheap to expensive                  | Relatively cheap             | Expensive                    | Relatively cheap                |
|            | 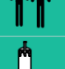 Personnel                     | Team effort                        | Individual-team effort              | Team effort                  | Team effort                  | Individual-team effort          |
|            | 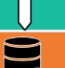 Equipment                     | Low - High tech<br>Long-term usage | Low - High tech<br>Long-term usage  | High tech<br>Long-term usage | High tech<br>Long-term usage | Low tech<br>Short-term usage    |
| Outcome    | 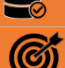 Data Integration              | ★★★★★                              | ★★★★★                               | ★★★★★                        | ★★★★★                        | ★★★★★                           |
|            | 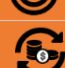 Accuracy                     | ★★★★★                              | ★★★★★                               | ★★★★★                        | ★★★★★                        | ★★★★★                           |
|            | 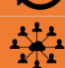 Efficiency                  | ★★★★★                              | ★★★★★                               | ★★★★★                        | ★★★★★                        | ★★★★★                           |
|            | 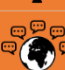 International Collaboration | Not necessary                      | Not necessary                       | Necessary                    | Necessary                    | Mostly necessary                |
|            | 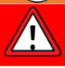 Data Sharing                | Rarely open access                 | Increasingly open access            | Mostly open access           | Mostly open access           | Mostly open access              |
|            | 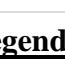 Caveats                     | Human error, seasonality           | Lack of funding, instrument failure | Weather conditions           | Incomplete data integration  | Large spatial coverage required |

### Legend

**Temporal and Spatial scale** – green check marks indicate strategies that we deem to be particularly strong in this respect while orange check marks indicate strategies with a potential to cover temporal or spatial scales.

**Time** – the amount of time required to obtain a comprehensive dataset, based on the research question. Snapshot sampling is attractive based upon this criterion, yielding information at shorter time-scales than most other methods.

**Money** – the funds that the end-users need to invest to build or have access to the dataset. Remote sensing for instance is expensive to get up and running, but for end-users in academia the images are often available at no to low cost.

**Personnel** – the amount of (trained) employees needed to acquire data and maintain meaningful datasets. Is it typically a team effort or could individuals or small groups manage by themselves?

**Equipment** – the type of equipment needed to acquire data in a consistent manner, being technologically advanced or not, and remaining functional for longer or shorter periods.

**Data Integration** – how easily can datasets from different sampling efforts be combined into an integrated dataset?

**Accuracy** – It is hard to award distinctions for this criterion, different methods are appropriate for different types of questions

**Efficiency** – “Bang for the buck”. The amount of scientifically valuable data obtained per unit (monetary) investment.

**International Collaboration** – Is international collaboration essential to create a usable dataset?

**Data Sharing** – Feasibility to publish datasets in an open, publicly accessible format

**Caveats** – potential caveats linked to e.g. research purposes not being clear, funds not being permanently available or confounding effects of seasonality for the detection of long-term trends etc.
